# Supplementary material for: N6‐Methyladenosine‐Modified CBX1 Regulates Nasopharyngeal Carcinoma Progression Through Heterochromatin Formation and STAT1 Activation
Source: PubMed Central journal article supplement (PMC9798977; doi:10.1002/advs.202205091), 2022-10-30
Supplement: ADVS-9-2205091-s001.pdf [file ADVS-9-2205091-s001.pdf]

## Supporting Information

for *Adv. Sci.*, DOI 10.1002/adv.202205091

N<sup>6</sup>-Methyladenosine-Modified CBX1 Regulates Nasopharyngeal Carcinoma Progression Through Heterochromatin Formation and STAT1 Activation

*Yin Zhao, Shengyan Huang, Xirong Tan, Liufen Long, Qingmei He, Xiaoyu Liang, Jiewen Bai, Qingjie Li, Jiayi Lin, Yingqin Li, Na Liu, Jun Ma\* and Yupei Chen\**

## Supporting Information

### **N<sup>6</sup>-methyladenosine-modified CBX1 regulates nasopharyngeal carcinoma progression through heterochromatin formation and STAT1 activation**

*Yin Zhao, Shengyan Huang, Xirong Tan, Liufen Long, Qingmei He, Xiaoyu Liang, Jiewen Bai, Qingjie Li, Jiayi Lin, Yingqin Li, Na Liu, Jun Ma<sup>\*</sup>, Yupei Chen<sup>\*</sup>*

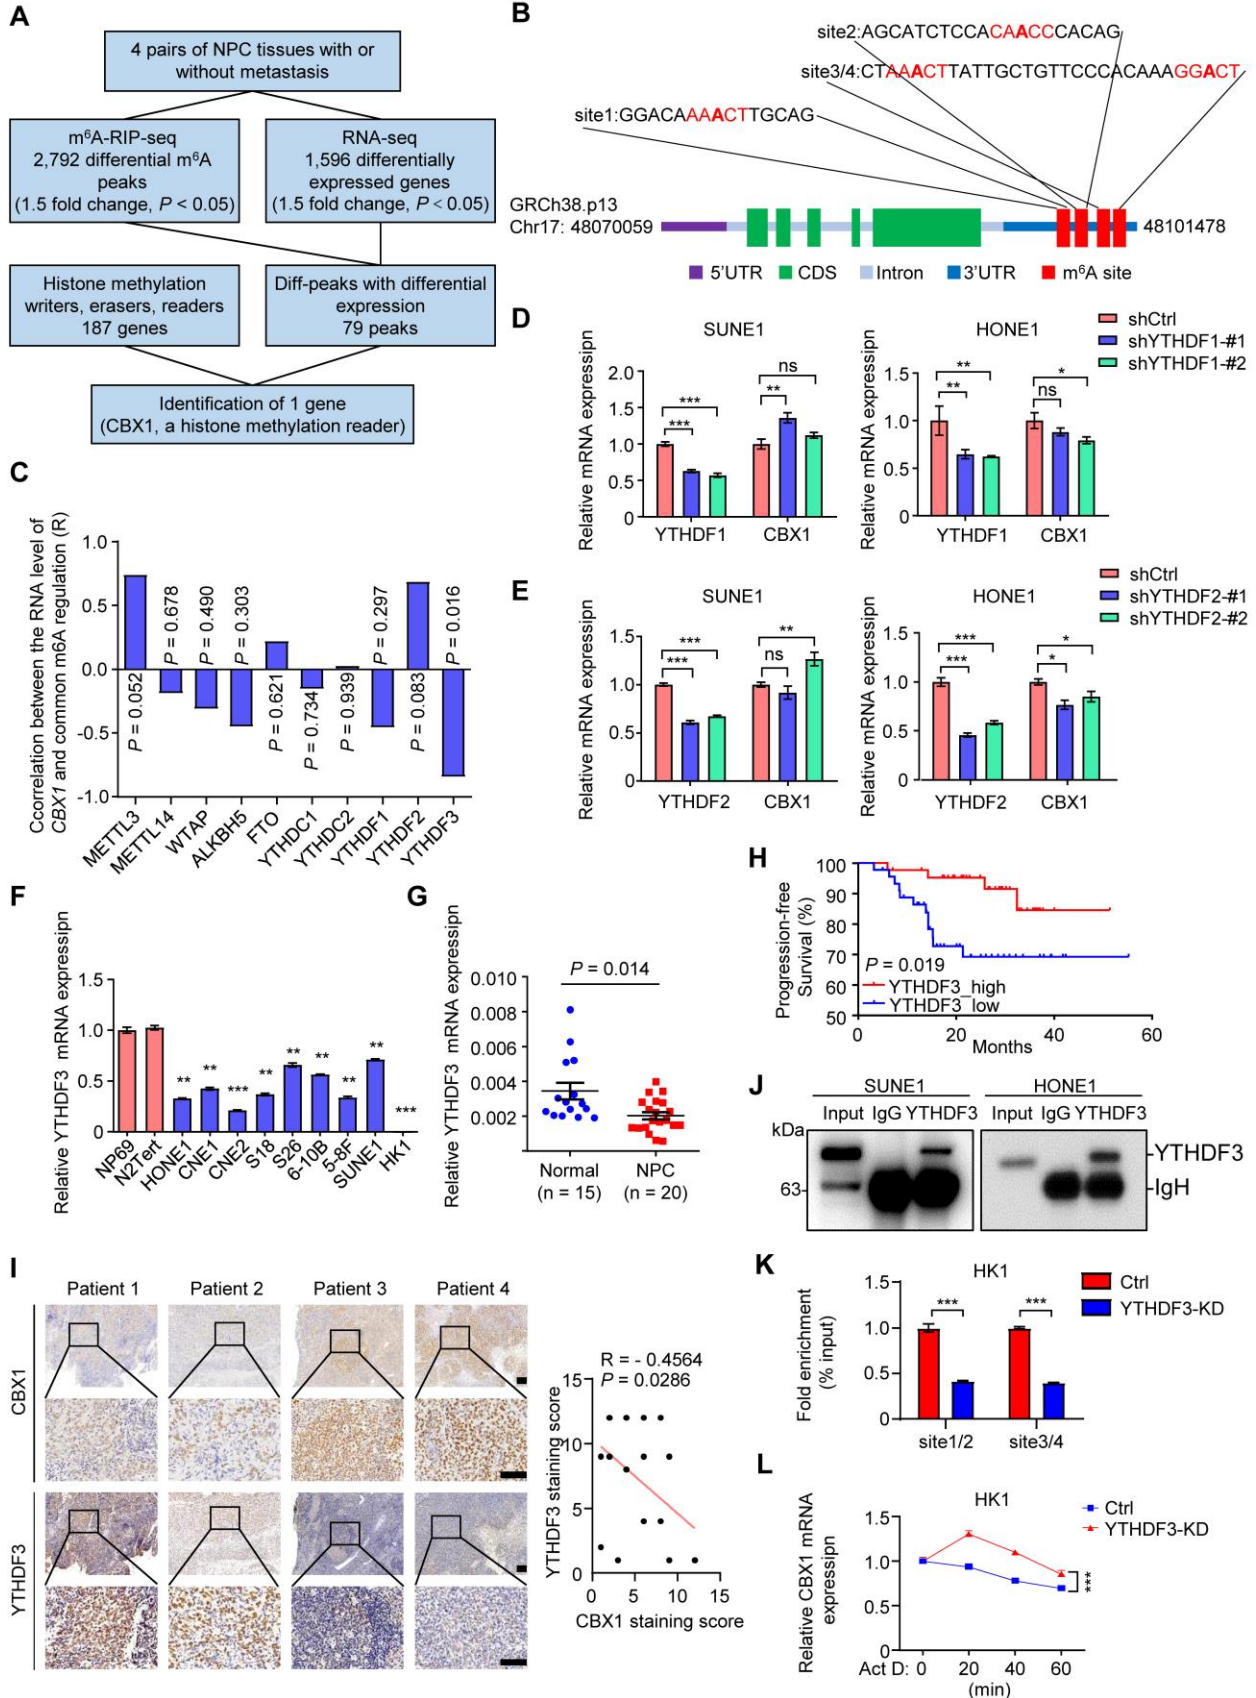

**Figure S1.** m<sup>6</sup>A-modified CBX1 mRNA was recognized and destabilized by the m<sup>6</sup>A reader YTHDF3. A) Flow chart for the identification of m<sup>6</sup>A modified histone methylation regulator in NPC. B) Schematic representation of positions of m<sup>6</sup>A motifs within CBX1 mRNA. C) Correlation between the mRNA expression level of CBX1 and common m<sup>6</sup>A regulators in NPC malignant cells (GSE150430 dataset). Seven NPC samples containing a total of 7,126 malignant cells ( $\geq 200$  cells per sample) profiled by single-cell RNA sequencing were analyzed. Pearson R statistical test was used. D) Relative mRNA levels of CBX1 and YTHDF1 in SUNE1 and HONE1 cells transfected with shRNA targeting Control (shCtrl) or YTHDF1 (shYTHDF1 #1 or #2). Mean ( $n = 3$ )  $\pm$  s.d. One-way ANOVA, ns, no significant, \*  $P < 0.05$ , \*\*  $P < 0.01$ , \*\*\*  $P < 0.001$ , ns, no significant. E) Relative mRNA levels of CBX1 and YTHDF2 in SUNE1 and HONE1 cells transfected with shRNA targeting Control (shCtrl) or YTHDF2 (shYTHDF2 #1 or #2). Mean ( $n = 3$ )  $\pm$  s.d. One-way ANOVA, ns, no significant, \*  $P < 0.05$ , \*\*  $P < 0.01$ , \*\*\*  $P < 0.001$ , ns, no significant. F) Relative mRNA levels of YTHDF3 in NP69, N2Tert, HONE1, CNE1, CNE2, S18, S26, 6-10B, 5-8F, SUNE1 and HK1 cells. Mean ( $n = 2$ )  $\pm$  s.d. One-way ANOVA, \*\*  $P < 0.01$ , \*\*\*  $P < 0.001$ . G) Relative mRNA levels of YTHDF3 in normal ( $n = 15$ ) and NPC ( $n = 20$ ) patients. Mean ( $n = 2$ )  $\pm$  s.d. Student's *t*-test. H) Kaplan-Meier analysis of progression-free survival according to the YTHDF3 expression levels in the GSE102349 dataset. The *P* values were determined using the log-rank test. I) Representative images of IHC staining for CBX1 and YTHDF3 ( $n = 23$ ), and correlation analysis of the expression of CBX1 and YTHDF3 according to IHC score statistic. Scale bars, 50  $\mu$ m. Pearson R statistical test was used. J) RIP (with anti-IgG or anti-YTHDF3) and western blotting of YTHDF3 in SUNE1 and HONE1 cells. K) RIP-qPCR analysis of YTHDF3 occupation in CBX1 m<sup>6</sup>A sites in HK1 cells transfected with siRNA targeting NC (Ctrl) or YTHDF3 (YTHDF3-KD). Mean ( $n = 3$ )  $\pm$  s.d. Student's *t*-test, \*\*\*  $P < 0.001$ . L) Relative mRNA levels of CBX1 in HK1 cells transfected with siRNA targeting NC (siNC) or YTHDF3 (siYTHDF3-KD) followed by treatment with actinomycin D (1  $\mu$ g/ml) by indicated time. Mean ( $n = 3$ )  $\pm$  s.d. Two-way ANOVA, \*\*\*  $P < 0.01$ .

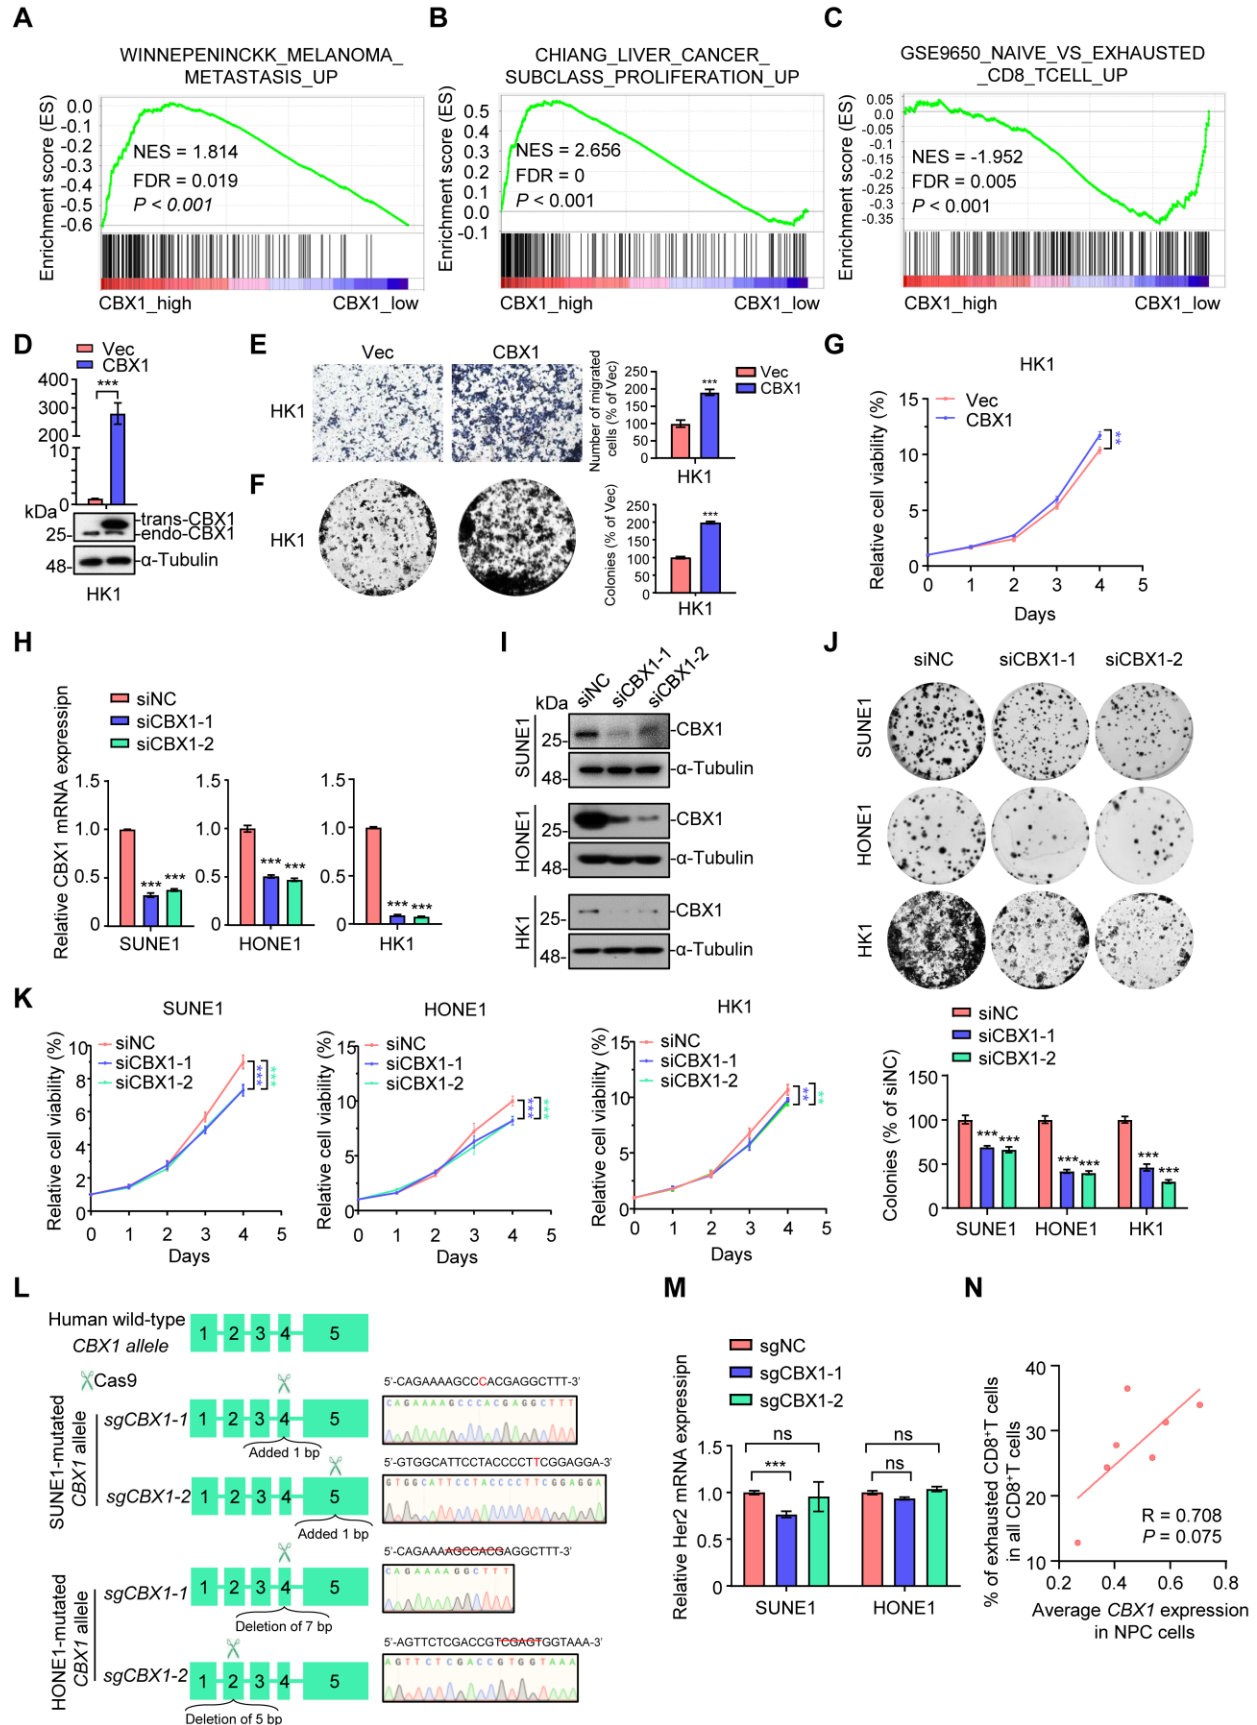

**Figure S2.** Knockdown of CBX1 suppresses NPC cell proliferation. A-C) GSEA analysis based on GSE102349 dataset showing metastasis- (A), proliferation- (B) and CD8 T cell- (C) related biological functions enriched in response to high CBX1 expression. D) Relative mRNA level of CBX1 and protein levels of CBX1 and  $\alpha$ -Tubulin in HK1 cells that overexpressed control vector or FLAG-CBX1. Mean (n = 3)  $\pm$  s.d. Student's *t*-test, \*\*\*  $P < 0.001$ . E-G) Representative images and quantification of transwell assay (E, without Matrigel), colony formation assays (F) and CCK-8 assays (G) in HK1 cells overexpressed control vector or FLAG-CBX1. Mean (n = 5 in E, n = 3 in F and n = 6 in G)  $\pm$  s.d. Student's *t*-test in (D, E, F), Two-way ANOVA in (G); \*\*\*  $P < 0.001$ . H, I) Relative mRNA of CBX1 (H) and protein levels of CBX1 and  $\alpha$ -Tubulin (I) in SUNE1, HONE1 or HK1 cells transfected with siRNA targeting NC (siNC) or CBX1 (siCBX1-1 or -2). Mean (n = 3)  $\pm$  s.d. One-way ANOVA, \*\*\*  $P < 0.001$ . J, K) Representative images and quantification of colony formation assays (J) and CCK-8 assays (K) in SUNE1 and HONE1 cells transfected with siRNA targeting NC (siNC) or *CBX1* (si*CBX1*-1 or -2). Mean (n = 3 in J, n = 6 in K)  $\pm$  s.d. ANOVA in J, two-way ANOVA in K, \*\*  $P < 0.01$ , \*\*\*  $P < 0.001$ . L) Strategy and amplicon sequencing of CRISPR/Cas9-mediated editing of *CBX1* gene in SUNE1 and HONE1 cells. M) Relative mRNA levels of Her2 in SUNE1 and HONE1 cells stably transfected with sgRNA targeting NC (sgNC) or CBX1 (sg*CBX1*-1 or -2). Mean (n = 3)  $\pm$  s.d. One-way ANOVA, ns, no significant, \*\*\*  $P < 0.001$ . N) Correlation analysis of average *CBX1* expression in NPC cells and proportion of exhausted CD8<sup>+</sup> T cells in all CD8<sup>+</sup> T cells (GSE150430 dataset). Pearson R statistical test was used.

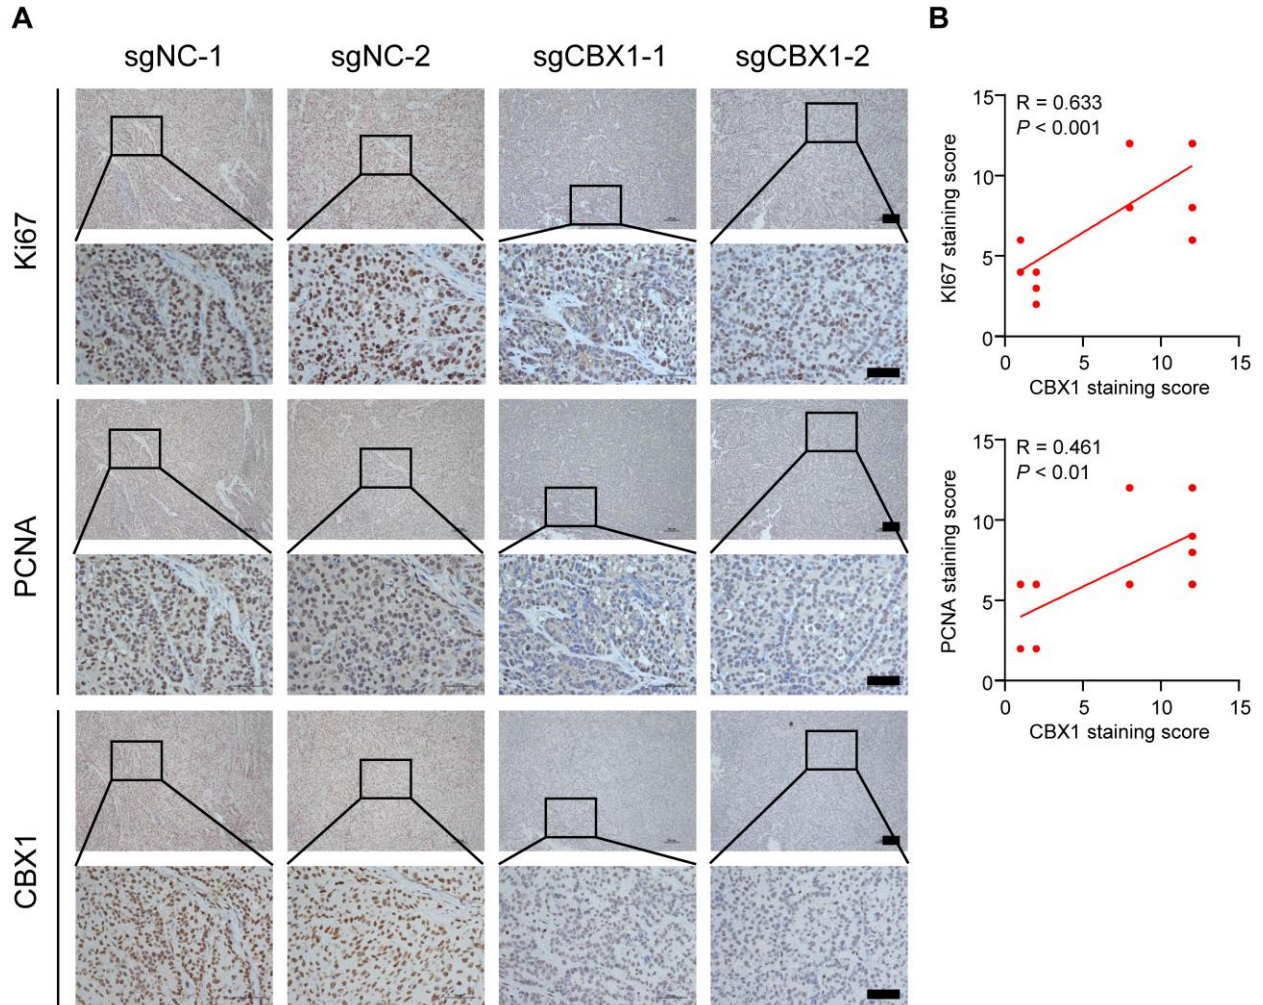

**Figure S3.** CBX1-knockout group had lower expression of Ki67 and PCNA. A, B) Representative images of IHC staining anti-CBX1, anti-Ki67 or anti-PCNA (A) and correlation analysis of CBX1 expression and Ki67 or PCNA expression according to IHC score statistic (B) in the axilla tumors of nude mice from sgNC or sgCBX1 group. Scale bars, 50  $\mu$ m. Pearson R statistical test was used.

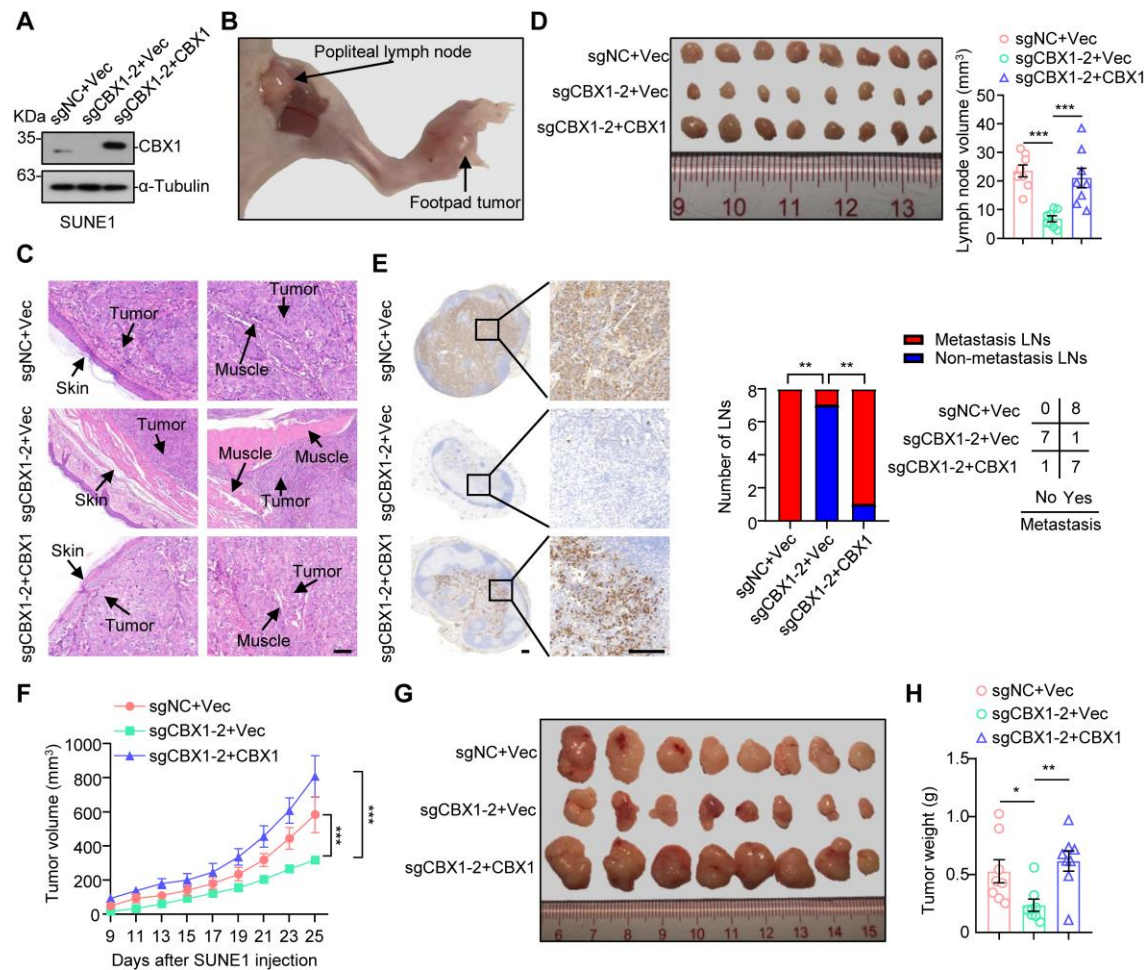

**Figure S4.** Restoring the expression of CBX1 significantly rescued the inhibitory effect of CBX1 knockout on NPC cell metastasis and tumor growth. A) Western blotting of CBX1 and  $\alpha$ -tubulin in SUNE1-sgNC cells with stable overexpression of empty vector, and SUNE1-sgCBX1-2 cells with stable overexpression of empty vector or FLAG-CBX1. B-E) The indicated cells were injected into footpads of nude mice to construct an inguinal lymph node metastasis model. Representative images of primary foot pad tumor and metastatic inguinal lymph node (B) and the primary tumors in footpads following H&E staining (C); images and quantification of the volumes of the inguinal lymph nodes (D); representative images of IHC staining (anti-keratin) of the inguinal lymph nodes; number of metastasis and non-metastasis inguinal lymph nodes (E). F-H) The indicated cells were injected into the axilla of nude mice to construct tumor growth model. Tumor growth curves (F), images (G) and weight (H) of tumors. Mean (n = 8)  $\pm$  s.d; One-way ANOVA in (D, H), chi-square ( $\chi^2$ ) test in (E), two-way ANOVA in F, \*  $P < 0.05$ , \*\*  $P < 0.01$ , \*\*\*  $P < 0.001$ ; Scale bars, 100  $\mu$ m.



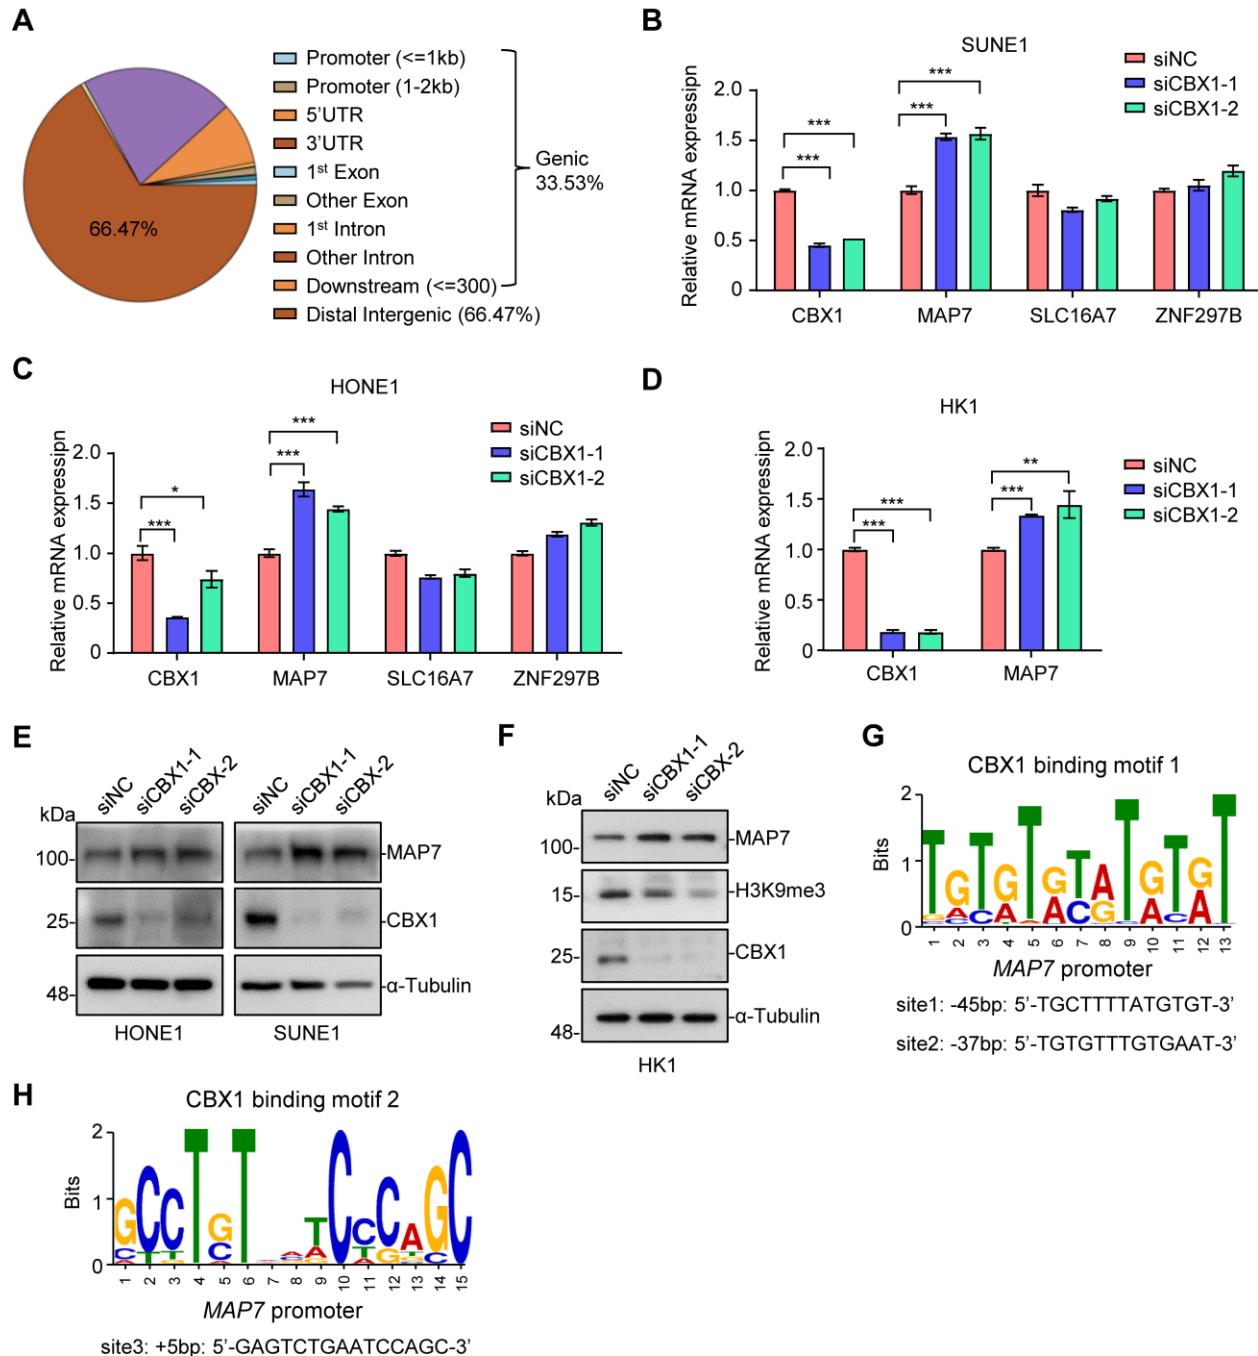

**Figure S5.** CBX1 targets MAP7 for H3K9me3-mediated transcriptional repression. A) ChIP-seq analysis in SUNE1 cells that overexpressed FLAG-CBX1. Distribution of genes enriched by FLAG-CBX1 ( $q$  value < 0.05). B, C) Relative mRNA levels of CBX1, MAP7, SLC16A7 and ZNF297B in SUNE1 (B) and HONE1 (C) cells transfected with siRNA targeting NC (siNC) or CBX1 (siCBX1-1 or -2). Mean ( $n = 3$ )  $\pm$  s.d. One-way ANOVA, \*  $P < 0.05$ , \*\*\*  $P < 0.001$ . D) Relative mRNA levels of CBX1 and MAP7 in HK1 cells transfected with siRNA targeting NC

(siNC) or CBX1 (siCBX1-1 or -2). Mean ( $n = 3$ )  $\pm$  s.d; One-way ANOVA, \*\*  $P < 0.01$ , \*\*\*  $P < 0.001$ . E) Western blotting of MAP7, CBX1 and  $\alpha$ -Tubulin in SUNE1 and HONE1 cells transfected with siRNA targeting NC (siNC) or CBX1 (siCBX1-1 or -2). F) Western blotting of MAP7, H3K9me3, CBX1 and  $\alpha$ -Tubulin in HK1 cells transfected with siRNA targeting NC (siNC) or CBX1 (siCBX1-1 or 2). G, H) CBX1 binding motifs and CBX1 binding sites on MAP7 promoter.

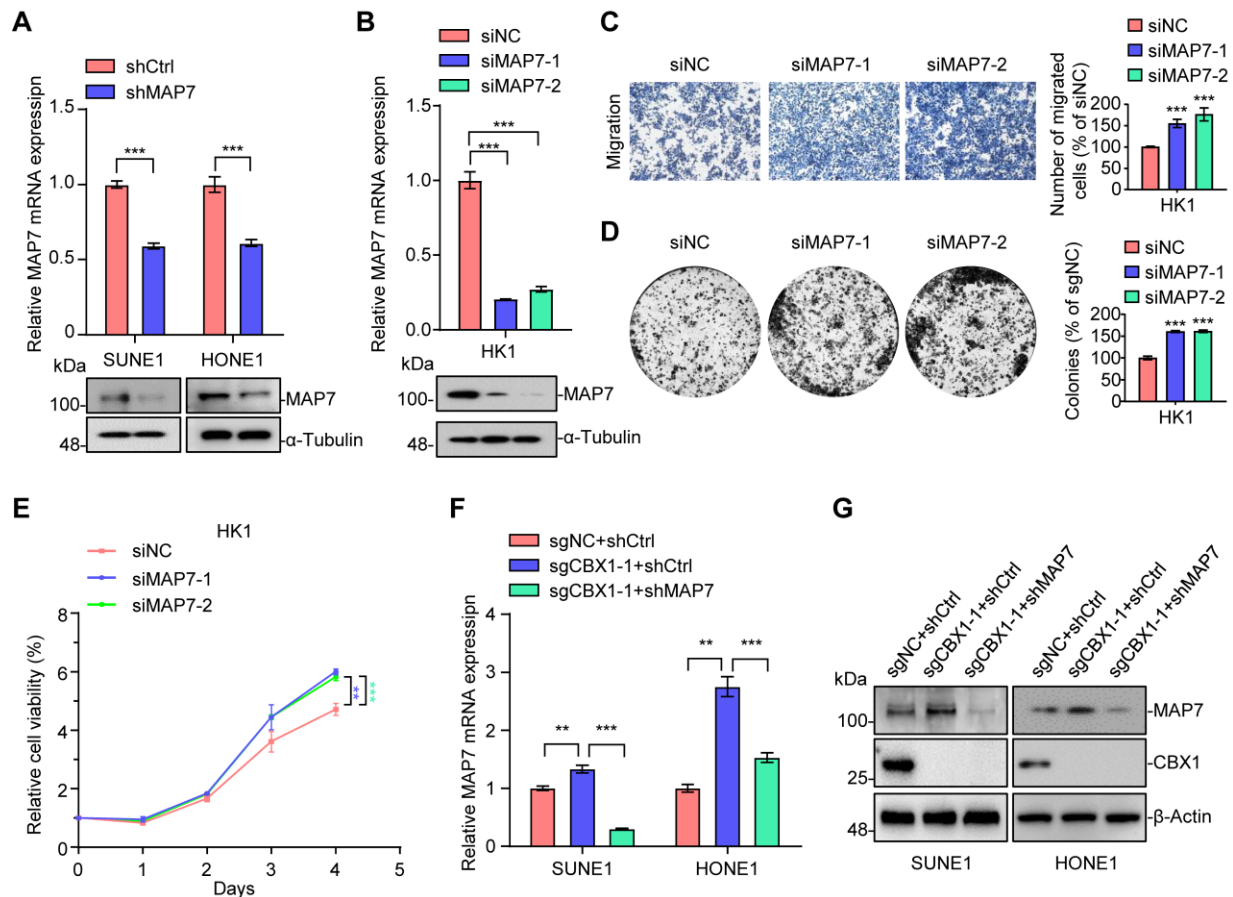

**Figure S6.** Knockdown of MAP7 significantly promoted NPC cell migration and proliferation. A) Relative mRNA of MAP7 (top) and protein levels of MAP7 and  $\alpha$ -Tubulin (bottom) in SUNE1 and HONE1 cells transfected with shRNA targeting control (shCtrl) or MAP7 (shMAP7). Mean ( $n = 3$ )  $\pm$  s.d. Student's *t*-test, \*\*\*  $P < 0.001$ . B) Relative mRNA level of MAP7 (top) and protein levels of MAP7 and  $\alpha$ -Tubulin (bottom) in HK1 cells transfected with siRNA targeting control (siNC) or MAP7 (siMAP7-1 or -2). Mean ( $n = 3$ )  $\pm$  s.d. One-way ANOVA, \*\*\*  $P < 0.001$ . C-E) Representative images and quantification of transwell assay (C, without Matrigel), colony formation assays (D) and CCK-8 assays (E) in HK1 cells that transfected with siRNA targeting control (siNC) or MAP7 (siMAP7-1 or -2). Mean ( $n = 5$  in C,  $n = 3$  in D and  $n = 6$  in E)  $\pm$  s.d; One-way ANOVA in C and D, two-way ANOVA in E, \*\*  $P < 0.01$ . \*\*\*  $P < 0.001$ . F, G) Relative mRNA of MAP7 (F) and protein levels of MAP7 and  $\alpha$ -Tubulin (G) in SUNE1 and HONE1 cells expressing sgNC or sgCBX1 transfected with shRNA targeting control (shCtrl) or MAP7 (shMAP7). Mean ( $n = 3$ )  $\pm$  s.d. One-way ANOVA, \*\*  $P < 0.01$ , \*\*\*  $P < 0.001$ .

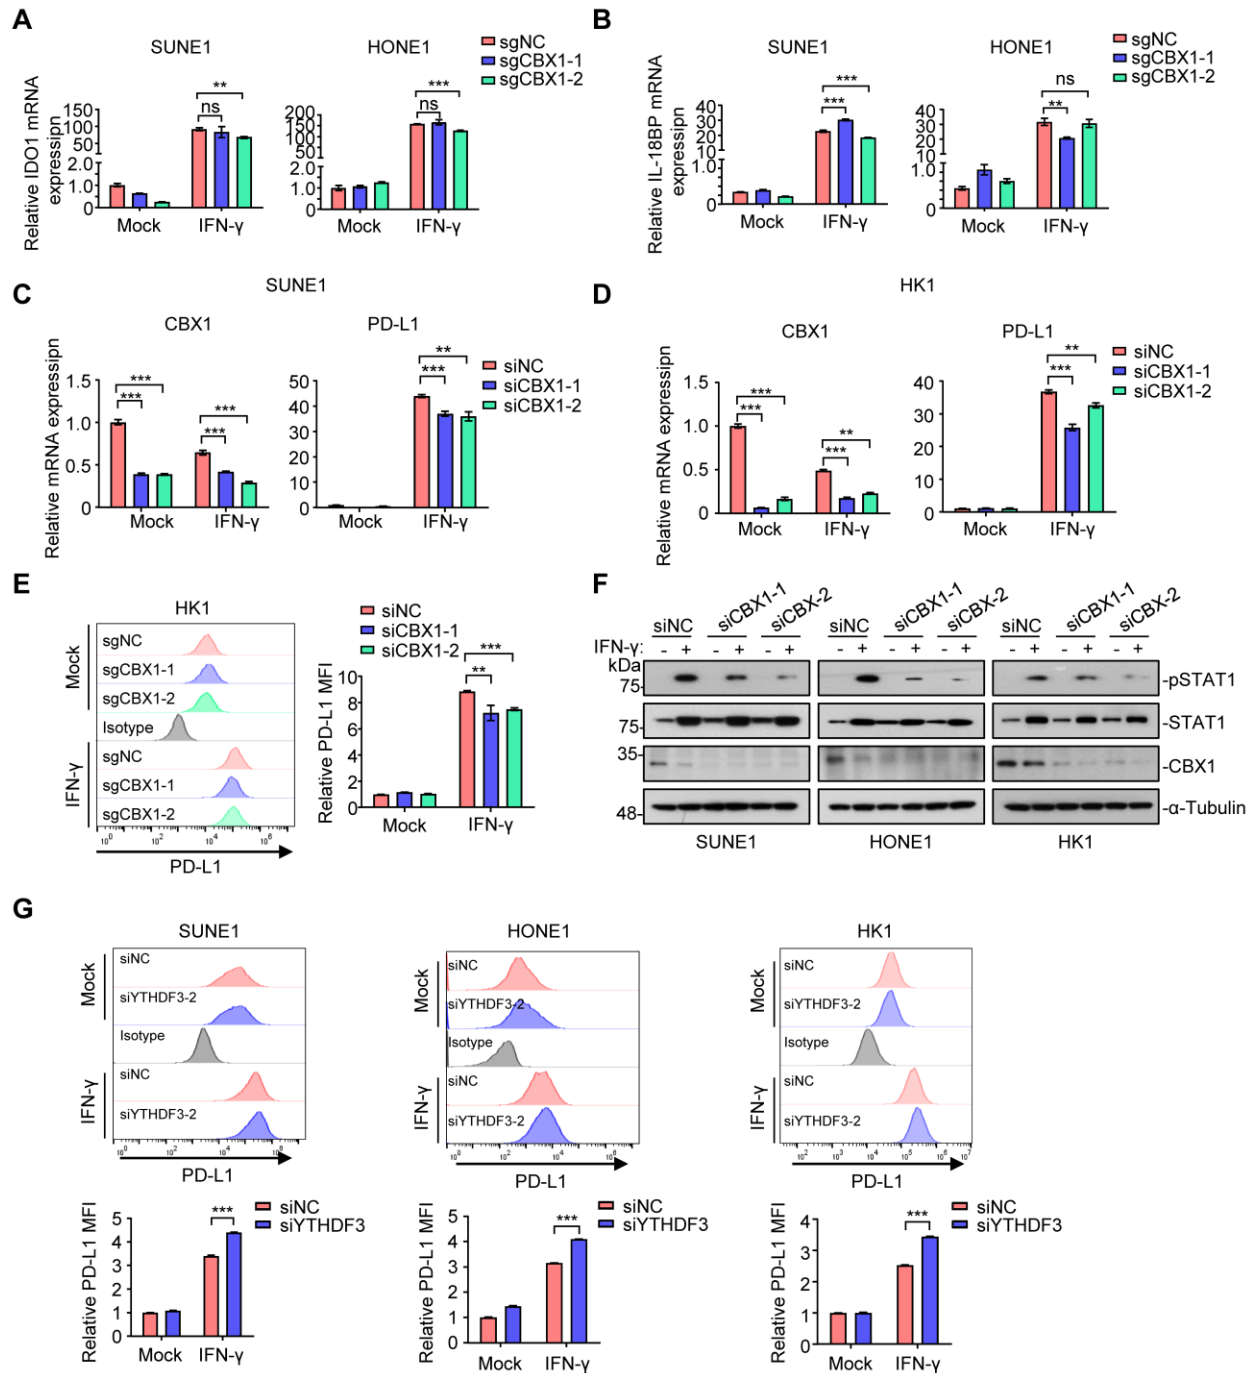

**Figure S7.** CBX1 inhibition suppresses PD-L1 expression-induced by IFN- $\gamma$ -STAT1 signaling. A, B) Relative mRNA of IDO1 and IL-18BP in SUNE1 and HONE1 cells stably transfected with sgRNA targeting NC (sgNC) or CBX1 (sgCBX1-1 or -2) treated with or without IFN- $\gamma$  for 24 hours (10 ng/ml). C, D) Relative mRNA of CBX1 and PD-L1 in SUNE1 (C) or HK1 (D) cells transfected with siRNA targeting NC (siNC) or CBX1 (siCBX1-1 or -2) treated with or without

IFN- $\gamma$  for 24 hours (10 ng/ml). Mean ( $n = 3$ )  $\pm$  s.d. One-way ANOVA, \*\*  $P < 0.01$ , \*\*\*  $P < 0.001$ , ns, no significant. E) Flow cytometry analysis of PD-L1 expression in siNC, siCBX1-1 or siCBX1-2 HK1 cells treated with or without IFN- $\gamma$  for 24 hours (10 ng/ml). MFI, mean fluorescent intensity. Mean ( $n = 3$ )  $\pm$  s.d. One-way ANOVA, \*\*  $P < 0.01$ . \*\*\*  $P < 0.001$ . F) Western blotting of pSTAT1, STAT1, FLAG-CBX1 and  $\alpha$ -Tubulin in SUNE1 and HONE1 cells transfected with siRNA targeting NC (siNC) or CBX1 (siCBX1-1 or -2) treated with or without IFN- $\gamma$  for 24 hours (10 ng/ml). G) Flow cytometry analyzing of PD-L1 expression in siNC or siYTHDF3 SUNE1, HONE1 or HK1 cells treated with or without IFN- $\gamma$  for 24 hours (10 ng/ml). MFI, mean fluorescent intensity. Mean ( $n = 3$ )  $\pm$  s.d. One-way ANOVA, \*\*\*  $P < 0.001$ .

**Table S1.** Writers, erasers and readers involved in histone methylation that identified from the WERAM database (<http://weram.biocuckoo.org/>).

| Histone methyltransferase<br>(Writers) | Histone demethylase<br>(Erasers) | Histone methylation reader<br>(Readers) |               |           |
|----------------------------------------|----------------------------------|-----------------------------------------|---------------|-----------|
| ASH1L                                  | AL513412.1                       | AF10                                    | JADE3         | SCML2     |
| DOT1L                                  | HR                               | AIRE                                    | KAT6B         | SFMBT1    |
| EHMT1                                  | JMJD1C                           | ANK2                                    | L3MBTL1       | SFMBT2    |
| EHMT2                                  | JMJD6                            | ATRX                                    | L3MBTL2       | Sgf29     |
| EZH1                                   | KDM1A                            | BAZ2A                                   | L3MBTL3       | SMN       |
| EZH2                                   | KDM2A                            | BPTF                                    | L3MBTL4       | SMN1      |
| KMT2A                                  | KDM2B                            | BRPF1                                   | LRWD1         | SMN2      |
| KMT2B                                  | KDM3A                            | CBX1                                    | MBTD1         | SMNDC1    |
| KMT2C                                  | KDM3B                            | CBX2                                    | MLLT6         | SND1      |
| KMT2D                                  | KDM4A                            | CBX3                                    | MORC3         | SPIN2A    |
| KMT2E                                  | KDM4B                            | CBX4                                    | MORC4         | SPIN2B    |
| MECOM                                  | KDM4C                            | CBX5                                    | MORF4L2       | SPIN3     |
| NSD1                                   | KDM4D                            | CBX6                                    | MPP8          | SPIN4     |
| NSD2                                   | KDM4E                            | CBX7                                    | MRG15         | Spindlin1 |
| NSD3                                   | KDM5A                            | CBX8                                    | MSH6          | TAF3      |
| PRDM1                                  | KDM5B                            | CDY1                                    | MSL3          | TCF19     |
| PRDM12                                 | KDM5C                            | CDY1B                                   | MTF2          | TDRD1     |
| PRDM16                                 | KDM5D                            | CDY2A                                   | NCAPD3        | TDRD15    |
| PRDM2                                  | KDM6A                            | CDY2B                                   | NCAPG2        | TDRD3     |
| PRDM5                                  | KDM6B                            | CDYL                                    | N-PAC         | TDRD6     |
| PRDM7                                  | KDM6C                            | CDYL2                                   | ORC1          | TP53BP1   |
| PRDM8                                  | KDM7A                            | CHD1                                    | PHF1          | TRIM24    |
| PRDM9                                  | KDM8                             | CHD2                                    | PHF10         | UHRF1     |
| PRMT1                                  | MINA                             | CHD3                                    | PHF12         | UHRF2     |
| PRMT4                                  | NO66                             | CHD4                                    | PHF13         | WDR5      |
| PRMT5                                  | PHF2                             | CHD5                                    | PHF14         | HDGFL1    |
| PRMT6                                  | PHF8                             | CXXC1                                   | PHF19         | ING1      |
| PRMT8                                  | RP11-146B14.1                    | DIDO1                                   | PHF23         | ING2      |
| SETD1A                                 |                                  | DNMT3A                                  | PHF3          | ING3      |
| SETD1B                                 |                                  | DNMT3B                                  | PHRF1         | ING4      |
| SETD2                                  |                                  | DNMT3L                                  | PSIP1         | PHF20     |
| SETD6                                  |                                  | DPF1                                    | Pygo1         | PHF20L1   |
| SETD7                                  |                                  | DPF2                                    | Pygo2         | PHF21A    |
| SETD8                                  |                                  | EED                                     | RAG2          | PHF21B    |
| SETDB1                                 |                                  | HDGF                                    | RNF17         | ZCWPW1    |
| SETDB2                                 |                                  | HDGF2                                   | RP11-382A20.3 | ZCWPW2    |
| SETMAR                                 |                                  | ING5                                    | RSF1          | ZMYND11   |
| SMYD1                                  |                                  | JADE1                                   | SCMH1         |           |
| SMYD2                                  |                                  | JADE2                                   | WDR5B         |           |
| SMYD3                                  |                                  |                                         |               |           |
| SUV39H1                                |                                  |                                         |               |           |

SUV39H2  
SUV420H1  
SUV420H2

---

**Table S2.** Correlations between CBX1 expression levels and clinical features in nasopharyngeal carcinoma patients.

| Characteristic     | Low expression group (%) | High expression group (%) | P-value* |
|--------------------|--------------------------|---------------------------|----------|
|                    | n = 138                  | n = 66                    |          |
| Age                |                          |                           | 0.6553   |
| ≤45                | 66 (47.83)               | 34 (51.52)                |          |
| >45                | 72 (52.17)               | 32 (48.48)                |          |
| Gender             |                          |                           | 0.2317   |
| Male               | 107 (77.54)              | 46 (69.70)                |          |
| Female             | 31 (22.46)               | 20 (30.30)                |          |
| TNM Stage†         |                          |                           | 0.3089   |
| II                 | 40 (28.99)               | 14 (21.21)                |          |
| III/IV             | 98 (71.01)               | 52 (78.79)                |          |
| Distant metastasis |                          |                           | <0.001   |
| Yes                | 12 (8.70)                | 19 (28.79)                |          |
| No                 | 126 (91.30)              | 47 (71.21)                |          |
| Disease            |                          |                           | <0.001   |
| Yes                | 25 (18.12)               | 30 (45.45)                |          |
| No                 | 113 (81.88)              | 36 (54.55)                |          |
| Death              |                          |                           | <0.001   |
| Yes                | 17 (12.32)               | 28 (42.42)                |          |
| No                 | 121 (87.68)              | 38 (57.58)                |          |

\* Chi-square test.

† All patients were restaged according to the 7<sup>th</sup> edition of the AJCC Cancer Staging Manual.



**Table S3.** List of primers used in this study.

| <b>Gene</b>                     | <b>Sequence (5' to 3')</b>                                      |
|---------------------------------|-----------------------------------------------------------------|
| <b>Real time RT-PCR primers</b> |                                                                 |
| CBX1-F                          | GAGCTACAGACTCCAGTGGAGA                                          |
| CBX1-R                          | GTAGGAATGCCACGTCAGCCTT                                          |
| MAP7-F                          | GTACTIONTTCCTCACATCTGGCAC                                       |
| MAP7-R                          | GCCAGGCAAATGAGGAAGAGAC                                          |
| YTHDF1-F                        | CAAGCACACAACCTCCATCTTCG                                         |
| YTHDF1-R                        | GTAAGAAACTGGTTCGCCCTCAT                                         |
| YTHDF2-F                        | TAGCCAGCTACAAGCACACCAC                                          |
| YTHDF2-R                        | CAACCGTTGCTGCAGTCTGTGT                                          |
| YTHDF3-F                        | GCTACTTTCAAGCATAACCACCTC                                        |
| YTHDF3-R                        | ACAGGACATCTTCATACGGTTATTG                                       |
| PD-L1-F                         | TGCCGACTACAAGCGAATTACTG                                         |
| PD-L1-R                         | CTGCTTGTCAGATGACTTCGG                                           |
| IDO1-F                          | GCCTGATCTCATAGAGTCTGGC                                          |
| IDO1-R                          | TGCATCCCAGAACTAGACGTGC                                          |
| IL-18BP-F                       | GTGTCCAGCATTGGAAGTGACC                                          |
| IL-18BP-R                       | GGAGGTGCTCAATGAAGGAACC                                          |
| Her2-F                          | GGAAGTACACGATGCGGAGACT                                          |
| Her2-R                          | ACCTTCCTCAGCTCCGTCTCTT                                          |
| SLC16A7-F                       | TGCTGGCTGTTATGTACGCAGG                                          |
| SLC16A7-R                       | GCCAACACCATTCCAAGACAGC                                          |
| ZNF297B-F                       | TGAGCACGGAAATGGCAAGCCA                                          |
| ZNF297B-R                       | GATCCAGCGTTTGTGAGCCATG                                          |
| GAPDH-F                         | GTCTCCTCTGACTTCAACAGCG                                          |
| GAPDH-R                         | ACCACCCTGTTGCTGTAGCCAA                                          |
| <b>shRNA primers</b>            |                                                                 |
| shRNA-YTHDF1-#1-F               | CCGGGTTCGTTACATCAGAAGGATACTCGAGTATCCTT<br>CTGATGTAACGAACCTTTTGG |
| shRNA-YTHDF1-#1-R               | AATTCAAAAAGTTCGTTACATCAGAAGGATACTCGAGT<br>ATCCTTCTGATGTAACGAAC  |
| shRNA-YTHDF1-#2-F               | CCGGGCCGTCCATTGGATTTCCCTTACTCGAGTAAGGAA<br>ATCCAATGGACGGCTTTTGG |
| shRNA-YTHDF1-#2-R               | AATTCAAAAAGCCGTCCATTGGATTTCCCTTACTCGAGTA<br>AGGAAATCCAATGGACGGC |
| shRNA-YTHDF2-#1-F               | CCGGCTAGAGAACAACGAGAATAAACTCGAGTTTATTC<br>TCGTTGTTCTCTAGTTTTTGG |
| shRNA-YTHDF2-#1-R               | AATTCAAAAACTAGAGAACAACGAGAATAAACTCGAG<br>TTTATTCTCGTTGTTCTCTAG  |
| shRNA-YTHDF2-#2-F               | CCGGGCAGACTTGCAGTTTAAGTATCTCGAGATACTTA<br>AACTGCAAGTCTGCTTTTTGG |
| shRNA-YTHDF2-#2-R               | AATTCAAAAAGCAGACTTGCAGTTTAAGTATCTCGAGA<br>TACTTAAACTGCAAGTCTGC  |

|                                                 |                                                                                       |
|-------------------------------------------------|---------------------------------------------------------------------------------------|
| shRNA- <i>MAP7</i> -F                           | CCGGGCCCTCTTACATAATGTATTTCTCGAGAAATACAT                                               |
| shRNA- <i>MAP7</i> -R                           | TATGTAAGAGGGCTTTTTG<br>AATTCAAAAAGCCCTCTTACATAATGTATTTCTCGAGA<br>AATACATTATGTAAGAGGGC |
| <b>siRNA sequences</b>                          |                                                                                       |
| siRNA- <i>YTHDF3</i> -#1                        | GACTAGCATTGCAACCAAT                                                                   |
| siRNA- <i>YTHDF3</i> -#2                        | GGACAATCAACACAAAGT                                                                    |
| siRNA-CBX1-1                                    | GTGGAGAGCTCATGTTCCT                                                                   |
| siRNA-CBX1-2                                    | GCGCAAAGCTGATTCTGAT                                                                   |
| siRNA- <i>MAP7</i> -1                           | GCAGCGTTGTTAACAGACT                                                                   |
| siRNA- <i>MAP7</i> -2                           | CACCTTTAGTGAAGGTAGA                                                                   |
| <b>sgRNA sequences</b>                          |                                                                                       |
| sgRNA-human- <i>CBX1</i> -1                     | TTACAGTCAGAAAAGCCACG                                                                  |
| sgRNA-human- <i>CBX1</i> -2                     | GTGGCATTCCCTACCCCTCGG                                                                 |
| sgRNA-human- <i>CBX1</i> -3                     | AAAAGTTCTCGACCGTCGAG                                                                  |
| sgRNA-mouse- <i>Cbx1</i> -1                     | TTACAGTCAGAAAAGCCACG                                                                  |
| sgRNA-mouse- <i>Cbx1</i> -2                     | AAACCCCGGGCAAAGCCTCG                                                                  |
| <b>ChIP-qPCR primers</b>                        |                                                                                       |
| <i>MAP7</i> -F                                  | TAGCACTTACTCCAGACGG                                                                   |
| <i>MAP7</i> -R                                  | TGAGTTGTCAACAAAGCCCA                                                                  |
| <b>m<sup>6</sup>A-RIP-qPCR/RIP-qPCR primers</b> |                                                                                       |
| CBX1-site1/2-F                                  | TTGCTGCGAAAAGCAAAGGG                                                                  |
| CBX1-site1/2-R                                  | CTGTGGGTTGTGGAGATGCT                                                                  |
| CBX1-site3/4-F                                  | TAAGCCAAGGTGTTCCCTGC                                                                  |
| CBX1-site3/4-R                                  | AGACCTTCCCTCCTCGTCAA                                                                  |

---
